# Supplementary material for: Core–shell Pd–P@Pt–Ni nanoparticles with enhanced activity and durability as anode electrocatalyst for methanol oxidation reaction
Source: Royal Society of Chemistry journal article supplement (doi:10.1039/d1ra07998k), 2022-01-01
Supplement: d1ra07998k1.pdf [file d1ra07998k1.pdf]

## Supplementary Information

### **Core-Shell Pd-P@Pt-Ni Nanoparticles with Enhanced Activity and Durability as Anode Electrocatalyst for Methanol Oxidation Reaction**

*Jiangbin Guo,<sup>a</sup> Man Zhang,<sup>b</sup> Jing Xu,<sup>\*a</sup> Jun Fang,<sup>a</sup> Shuiyuan Luo,<sup>a</sup> and Chaolong Yang<sup>\*c</sup>*

*<sup>a</sup>College of Chemical Engineering and Materials Science, Quanzhou Normal University, Quanzhou 362000, Fujian Province, PR China. E-mail: jingxu@qztc.edu.cn*

*<sup>b</sup>State Key Laboratory of Molecular Engineering of Polymers, Department of Macromolecular Science, Fudan University, Shanghai 200433, PR China*

*<sup>c</sup>School of Materials Science and Engineering, Chongqing University of Technology, Chongqing 400054, PR China. E-mail: yclzjun@163.com*

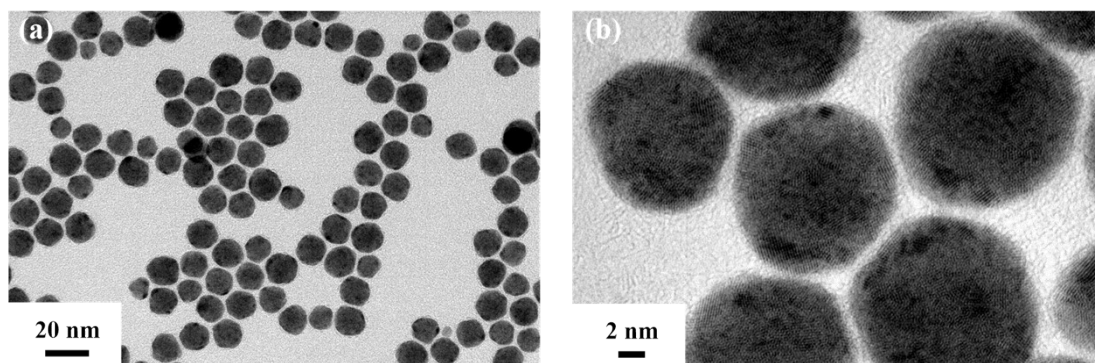

**Figure S1.** (a) Representative TEM and (b) HRTEM images of Pd-P@Pt-Ni NPs.

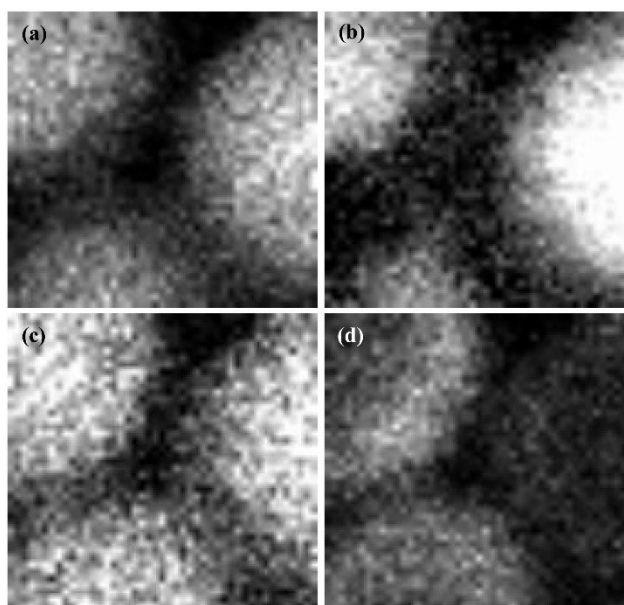

**Figure S2.** STEM-EDS images of (a) Pd, (b) P, (c) Ni and (d) Pt in Pd-P@Pt-Ni NPs.

**Table S1.** The amounts of Pt(acac)<sub>2</sub> and OAm corresponding to the TEM images in Figure S3.

| Sample | Pt(acac) <sub>2</sub> /mmol | OAm/mL | TEM image    |
|--------|-----------------------------|--------|--------------|
| 1      | 0.20                        | 10     | Figure S3(a) |
| 2      | 0.15                        | 10     | Figure S3(b) |
| 3      | 0.10                        | 10     | Figure S3(c) |
| 4      | 0.20                        | 17     | Figure S3(d) |
| 5      | 0.15                        | 17     | Figure S3(e) |
| 6      | 0.13                        | 17     | Figure S3(f) |

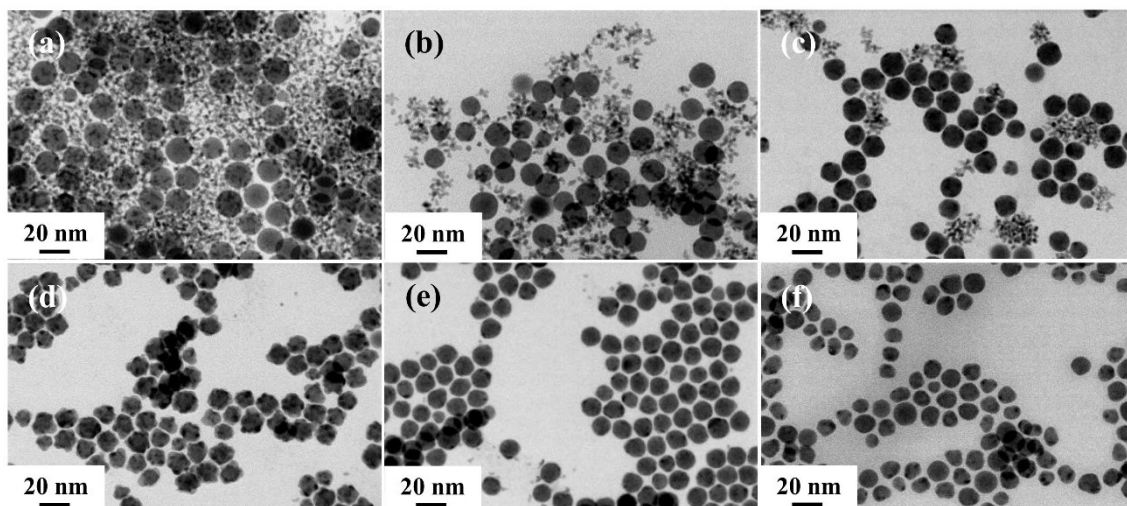

**Figure S3.** TEM images of products fabricated with different amounts of  $\text{Pt}(\text{acac})_2$  and OAm. The detailed information is summarized in Table S1.

**Table S2.** Peak position ( $2\theta$ ),  $d$ -spacing and lattice parameter collected from XRD data.

| materials       | plane (111) |              |                   | plane (220) |                   |
|-----------------|-------------|--------------|-------------------|-------------|-------------------|
|                 | $2\theta$   | $d$ -spacing | lattice parameter | $2\theta$   | lattice parameter |
|                 | (degree)    | (nm)         | (nm)              | (degree)    | (nm)              |
| Pd-P@Pt-Ni/C    | 40.13       | 0.2244       | 0.3887            | 68.67       | 0.3861            |
| commercial Pt/C | 39.72       | 0.2267       | 0.3927            | 67.55       | 0.3917            |
| Ni powder       | 44.61       | 0.2029       | 0.3514            | 76.48       | 0.3519            |

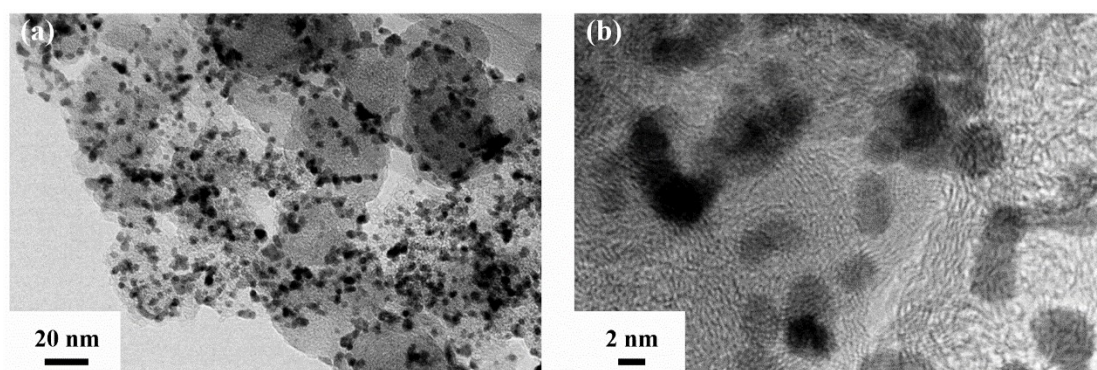

**Figure S4.** (a) TEM and (b) HRTEM images of the as-prepared Pt/C NPs.

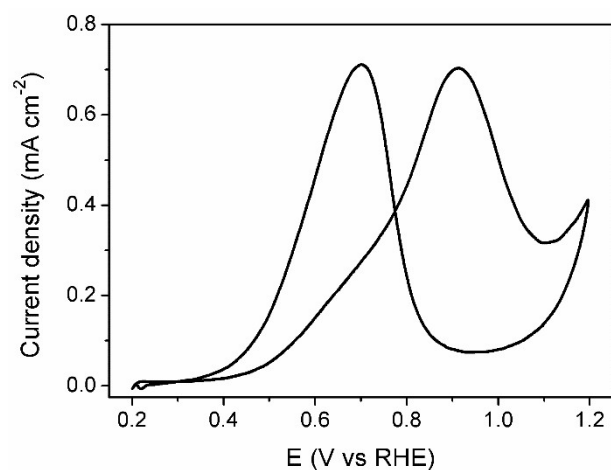

**Figure S5.** CV curve of Pd-P@Pt-Ni/C NPs in 0.5 M H<sub>2</sub>SO<sub>4</sub> + 10 M CH<sub>3</sub>OH solution. The sweep rate is 50 mV·s<sup>-1</sup>.

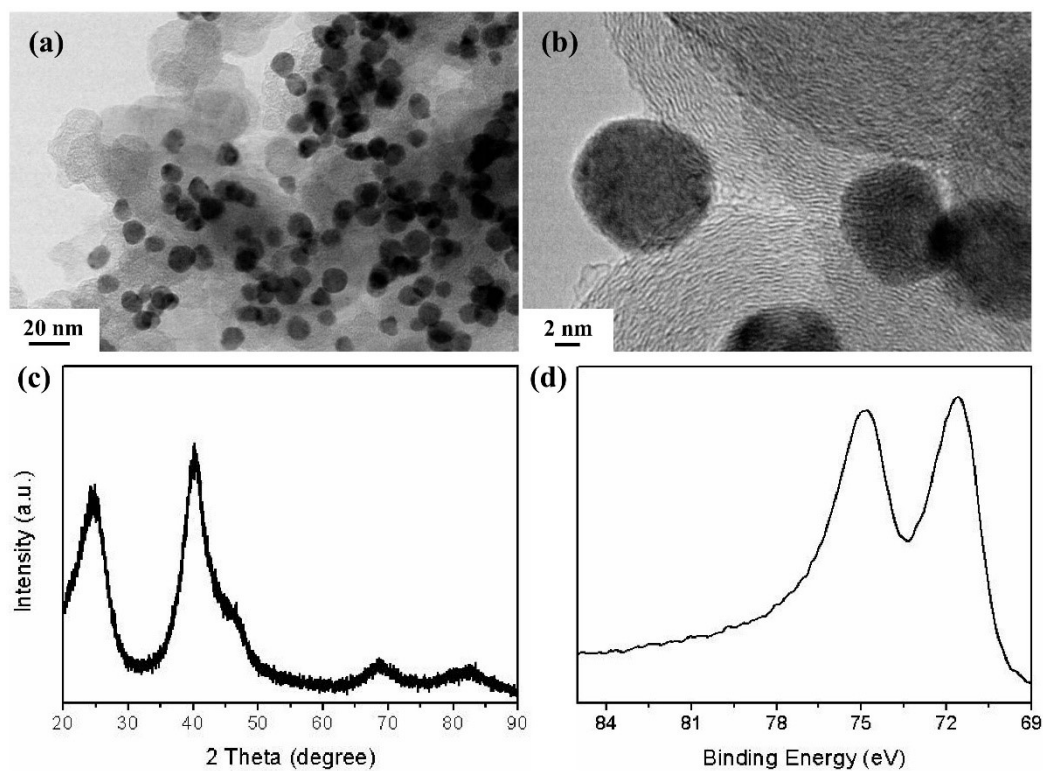

**Figure S6.** (a)-(b) TEM and HRTEM images, (c) XRD pattern and (d) XPS spectrum of Pt 4f in Pd-P@Pt-Ni/C after the stability test.

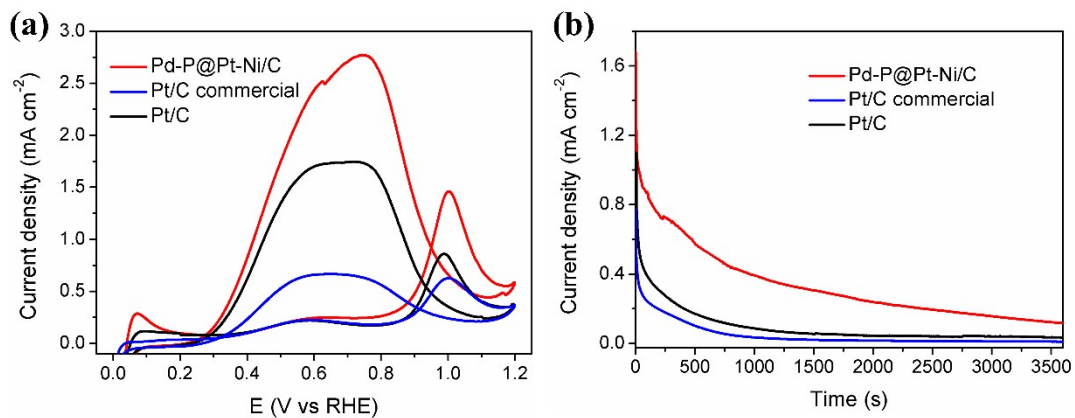

**Figure S7.** (a) CV curves of Pd-P@Pt-Ni/C NPs, commercial Pt/C and the as-prepared Pt/C in 0.5 M H<sub>2</sub>SO<sub>4</sub> + 0.5 M HCOOH solution. The sweep rate is 50 mV·s<sup>-1</sup>. (b) Chronoamperometry curves of Pd-P@Pt-Ni/C NPs, commercial Pt/C and the as-prepared Pt/C in 0.5 M H<sub>2</sub>SO<sub>4</sub> + 0.5 M HCOOH solution at 0.95 V.

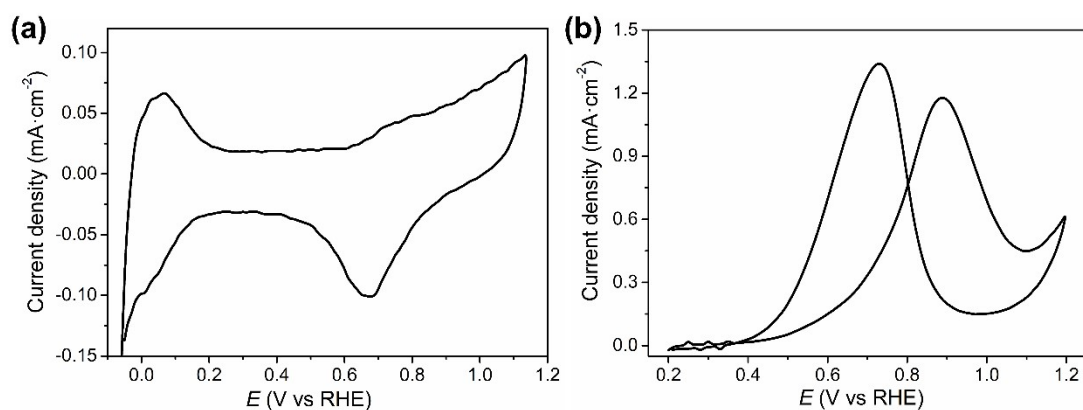

**Figure S8.** Cyclic voltammetry profiles of Pd-P@Pt/C NPs (a) in N<sub>2</sub>-saturated 0.1 M HClO<sub>4</sub> solution and (b) in 0.5 M H<sub>2</sub>SO<sub>4</sub> + 1 M CH<sub>3</sub>OH solution. The sweep rate is 50 mV·s<sup>-1</sup>.
